# Supplementary material
Source: PubMed Central journal article supplement (PMC4683365)
Supplement: supp_msv133_S1_Table-Beabout_MBE-15-0264.pdf [file supp_msv133_S1_Table-Beabout_MBE-15-0264.pdf]

**S1 Table:** List of mutations identified from Run 1 and 2 that reached  $\geq 5\%$  within the population, or were identified in sequenced isolates from the end of adaptation.

| Run | Mutation          | Annotation                                                          | Coding Change             | Locus Tag <sup>a</sup> | Contig | Position | Highest Freq. |
|-----|-------------------|---------------------------------------------------------------------|---------------------------|------------------------|--------|----------|---------------|
| 1   | $\Delta 12$ -bp   | Ribosomal S10 protein                                               | R53Q- $\Delta 54$ -57ATHK | 1375                   | 763    | 35,999   | 99.9%         |
| 1   | $\Delta 87$ -bp   | Intergenic (51-bp upstream of <i>tetM</i> )                         | N/A                       | N/A                    | 778    | 138,433  | 90.6%         |
| 1   | G $\rightarrow$ A | Serine/threonine protein kinase PrkC, regulator of stationary phase | A196V                     | 2283                   | 801    | 27,053   | 16.1%         |
| 1   | G $\rightarrow$ T | N-acetylmuramoyl-L-alanine amidase family 4                         | E57*                      | 2682                   | 810    | 168,069  | 15.6%         |
| 1   | $\Delta 71$ -bp   | Intergenic                                                          | N/A                       | N/A                    | 775    | 6,290    | 14.6%         |
| 1   | C $\rightarrow$ A | Cobalt ABC Transporter                                              | G212V                     | 187                    | 730    | 27,780   | 6.3%          |
| 1   | $\Delta 37$ -bp   | Intergenic (98-bp upstream of <i>tetM</i> )                         | N/A                       | N/A                    | 778    | 138,480  | 4.2%          |
| 1   | $\Delta 22$ -bp   | Intergenic (231-bp upstream of <i>tetM</i> )                        | N/A                       | N/A                    | 778    | 138,613  | 0.8%          |
| 2   | $\Delta 12$ -bp   | Ribosomal S10 protein                                               | R53Q- $\Delta 54$ -57ATHK | 1375                   | 763    | 35,999   | 94.7%         |
| 2   | $\Delta 125$ -bp  | Intergenic (36-bp upstream of <i>tetM</i> )                         | N/A                       | N/A                    | 778    | 138,448  | 94.5%         |
| 2   | T $\rightarrow$ A | ABC Transporter 1                                                   | T278S                     | 2766                   | 810    | 260,239  | 23.6%         |
| 2   | G $\rightarrow$ C | ABC Transporter 2                                                   | G73A                      | 1948                   | 785    | 39,763   | 21.8%         |
| 2   | T $\rightarrow$ C | Type 1 restriction modification system, specificity subunit S       | L187L                     | 1696                   | 778    | 18,115   | 14.0%         |
| 2   | T $\rightarrow$ C | Type 1 restriction modification system, specificity subunit S       | L187F                     | 1696                   | 778    | 18,117   | 13.7%         |
| 2   | C $\rightarrow$ A | Transcriptional regulator, Cro/Ci family                            | S49Y                      | 971                    | 749    | 98,114   | 12.8%         |
| 2   | G $\rightarrow$ A | Intergenic                                                          | N/A                       | N/A                    | 739    | 26,573   | 9.6%          |
| 2   | G $\rightarrow$ A | O-succinylbenzoic acid-CoA Ligase                                   | A409A                     | 2055                   | 787    | 9,405    | 9.5%          |
| 2   | G $\rightarrow$ T | Cell division trigger factor                                        | E60*                      | 2468                   | 809    | 107,415  | 9.5%          |
| 2   | C $\rightarrow$ G | Hypothetical Protein                                                | G293R                     | 842                    | 746    | 25,723   | 8.4%          |
| 2   | C $\rightarrow$ A | Hypothetical Protein                                                | W295L                     | 842                    | 746    | 25,716   | 8.1%          |

|   |                    |                                                               |            |      |     |         |      |
|---|--------------------|---------------------------------------------------------------|------------|------|-----|---------|------|
| 2 | C→A                | Intergenic                                                    | N/A        | N/A  | 720 | 3,617   | 7.9% |
| 2 | Δ12-bp             | Ribosomal S10 protein                                         | Δ52-55VRAT | 1375 | 763 | 35,994  | 7.3% |
| 2 | G→A                | Type 1 restriction modification system, specificity subunit S | K195K      | 1696 | 778 | 18,141  | 6.3% |
| 2 | A→T                | Zn-dependent hydrolase (Beta-lactamase superfamily)           | L55F       | 963  | 749 | 92,039  | 5.7% |
| 2 | A→T                | Type 1 restriction modification system, specificity subunit S | T181T      | 1696 | 778 | 18,099  | 5.4% |
| 2 | 1,505 Kb insertion | Transposase IS204 insertion into Tn916                        | N/A        | 733  | 778 | 135,277 | 0.3% |

<sup>a</sup>Locus tags were obtained from *E. faecalis* S613 file annotated by PATRIC (<http://www.patricbrc.org>)
