# Supplementary material
Source: PubMed Central journal article supplement (PMC4683365)
Supplement: supp_msv133_S2_Table-Beabout_MBE-15-0264.pdf [file supp_msv133_S2_Table-Beabout_MBE-15-0264.pdf]

**S2 Table:** Genotypes of bioreactor-adapted TGC resistant (BTR) clonal strains isolated from the end of adaptation

| Run | Strain <sup>a</sup> | MIC <sub>TGC</sub> (µg/mL) | Deletions in 5'UTR of <i>tetM</i>   | New Tn916 Insertion Sites <sup>b</sup>                   | Clones <sup>c</sup> |
|-----|---------------------|----------------------------|-------------------------------------|----------------------------------------------------------|---------------------|
| N/A | S613                | 0.125                      | None                                | None                                                     | N/A                 |
| 1   | BTR87a              | 2.0                        | Δ87-bp, 51-bp upstream <i>tetM</i>  | <i>yycI</i>                                              | 2                   |
| 1   | BTR87b              | 2.0                        | Δ87-bp, 51-bp upstream <i>tetM</i>  | Intergenic site J                                        | 1                   |
| 1   | BTR22               | 2.0                        | Δ22-bp, 231-bp upstream <i>tetM</i> | None                                                     | 3                   |
| 1   | BTR37               | 1.0                        | Δ37-bp, 98-bp upstream <i>tetM</i>  | <i>yycI</i> , Sulfatase, Intergenic sites C, D, H, and I | 2                   |
| 1   | BTR0                | 0.5                        | None                                | None                                                     | 1                   |
| 2   | BTR125a             | 2.0                        | Δ125-bp, 36-bp upstream <i>tetM</i> | O-antigen ligase <sup>d</sup>                            | 1                   |
| 2   | BTR125b             | 2.0                        | Δ125-bp, 36-bp upstream <i>tetM</i> | None                                                     | 3                   |
| 2   | BTR0                | 0.5                        | None                                | None                                                     | 1                   |

<sup>a</sup>All BTR strains have the S10<sup>R53Q-Δ54-58KTHK</sup> allele.

<sup>b</sup>All strains retained the ancestral insertion of Tn916. Strains with multiple copies of Tn916 retained the wildtype sequence at the ancestral site.

<sup>c</sup>Number of clones sequenced with the corresponding genotype.

<sup>d</sup>This copy of Tn916 has an insertion of the IS204 transposon downstream of *tetM*.
