# Supplementary material
Source: PubMed Central journal article supplement (PMC4683365)
Supplement: supp_msv133_S3_Table-Beabout_MBE-15-0264.pdf [file supp_msv133_S3_Table-Beabout_MBE-15-0264.pdf]

**S3 Table:** List of new Tn916 insertion sites identified in the population samples from Run 1 and 2

| Run | Gene/Intergenic      | Locus Tag <sup>a</sup> | Contig | Position | V583 Position |
|-----|----------------------|------------------------|--------|----------|---------------|
| 1   | Intergenic A         | N/A                    | 779    | 30,972   | 94,670        |
| 1   | Intergenic B         | N/A                    | 736    | 10,002   | 279,291       |
| 1   | Phage integrase      | 2328                   | 805    | 15,959   | 445,762       |
| 1   | Intergenic C         | N/A                    | 790    | 3,755    | N/A           |
| 1   | Intergenic D         | N/A                    | 809    | 14,067   | 583,591       |
| 1   | Intergenic E         | N/A                    | 809    | 53,587   | 620,190       |
| 1   | Intergenic F         | N/A                    | 809    | 85,011   | 671,283       |
| 1   | Hypothetical protein | 824                    | 746    | 2,478    | 731,474       |
| 1   | Hypothetical protein | 2012                   | 785    | 106,463  | 838,940       |
| 1   | Hypothetical protein | 1928                   | 785    | 19,546   | 927,138       |
| 1   | Hypothetical protein | 1925                   | 785    | 18,134   | 927,572       |
| 1   | Intergenic G         | N/A                    | 785    | 258      | 945,668       |
| 1   | Intergenic H         | N/A                    | 751    | 12,994   | 988,626       |
| 1   | <i>yycI</i>          | 962                    | 749    | 91,333   | 1,163,977     |
| 1   | Intergenic I         | N/A                    | 749    | 111,477  | 1,177,993     |
| 1   | Intergenic J         | N/A                    | 749    | 116,915  | 1,181,679     |
| 1   | Intergenic K         | N/A                    | 749    | 165,449  | 1,230,204     |
| 1   | Intergenic L         | N/A                    | 749    | 225,810  | 1,290,431     |
| 1   | Intergenic M         | N/A                    | 810    | 184,830  | 1,553,323     |
| 1   | Intergenic N         | N/A                    | 772    | 23,123   | 1,872,853     |
| 1   | Sulfatase            | 1580                   | 772    | 34,410   | 1,884,260     |
| 1   | ABC transport system | 344                    | 731    | 101,448  | 2,505,586     |
| 1   | Intergenic O         | N/A                    | 731    | 95,161   | 2,518,299     |
| 1   | Intergenic P         | N/A                    | 730    | 29,285   | 2,676,464     |
| 1   | Intergenic Q         | N/A                    | 778    | 116,150  | 2,803,049     |
| 1   | Intergenic R         | N/A                    | 819    | 185      | 3,034,032     |
| 1   | Hypothetical protein | 17                     | 718    | 10,283   | N/A           |
| 1   | Intergenic S         | N/A                    | 798    | 129      | 507,055       |
| 2   | Intergenic T         | N/A                    | 728    | 32,518   | 34,623        |
| 2   | Intergenic U         | N/A                    | 736    | 9,904    | 279,392       |
| 2   | <i>ktrB</i>          | 509                    | 736    | 8,652    | 280,644       |
| 2   | Intergenic V         | N/A                    | 809    | 14,067   | 583,591       |
| 2   | Intergenic W         | N/A                    | 809    | 53,577   | 620,190       |
| 2   | <i>pqqE</i>          | 2435                   | 809    | 72,216   | 635,312       |
| 2   | Hypothetical protein | 792                    | 744    | 5,603    | 1,065,869     |
| 2   | Hypothetical protein | 983                    | 749    | 12,899   | 1,082,887     |
| 2   | <i>yycI</i>          | 962                    | 749    | 91,343   | 1,163,977     |
| 2   | Intergenic X         | N/A                    | 749    | 116,913  | 1,181,679     |

|   |                           |      |     |         |           |
|---|---------------------------|------|-----|---------|-----------|
| 2 | Intergenic Y              | N/A  | 749 | 282,540 | 1,354,664 |
| 2 | Intergenic Z              | N/A  | 768 | 16,604  | 1,354,692 |
| 2 | Intergenic AA             | N/A  | 772 | 23,115  | 1,872,853 |
| 2 | Intergenic BB             | N/A  | 724 | 3,871   | 2,066,469 |
| 2 | O-antigen ligase          | 75   | 724 | 15,092  | 2,077,034 |
| 2 | Intergenic CC             | N/A  | 742 | 161,863 | 2,382,841 |
| 2 | Intergenic DD             | N/A  | 731 | 95,162  | 2,518,299 |
| 2 | Transcriptional regulator | 1712 | 778 | 38,085  | 2,868,762 |
| 2 | Intergenic EE             | N/A  | 765 | 13,722  | 3,201,504 |
| 2 | Intergenic FF             | N/A  | 817 | 1,263   | N/A       |
| 2 | Intergenic GG             | N/A  | 817 | 1,280   | N/A       |

<sup>a</sup>Locus tags were obtained from *E. faecalis* S613 file annotated by PATRIC (<http://www.patricbrc.org>)
