# Supplementary material
Source: PubMed Central journal article supplement (PMC4683365)
Supplement: supp_msv133_S4_Table-Beabout_MBE-15-0264.pdf [file supp_msv133_S4_Table-Beabout_MBE-15-0264.pdf]

**S4 Table:** List of primers used.

| Primer Name                              | Sequence (5' – 3')      | Purpose           |
|------------------------------------------|-------------------------|-------------------|
| <i>gdh</i> -F                            | AGCCAAGCAAGAACAGAAGC    | qPCR              |
| <i>gdh</i> -R                            | ATTGCGACATTCCCCTACTACC  | qPCR              |
| <i>tetM</i> -F                           | TGGGCTTCCATTGGTTTATC    | qPCR              |
| <i>tetM</i> -R                           | AGCAAGCATCCGAAAATCTG    | qPCR              |
| <i>Int</i> -Tn916-F                      | CAAAATCTAAATCTGGAAGTGTC | qPCR              |
| <i>Int</i> -Tn916-R                      | CAAGATGATTGTGTTTCGGAAGA | qPCR              |
| Circular-Tn916-F                         | TGCTCGAAGCCCTTTAGAATAA  | qPCR              |
| Circular-Tn916-R                         | AAATTGAGTGGTTTTGACCTTGA | qPCR              |
| <i>tetM</i> -5'UTR-F                     | TTTCCTGCATCAACATGAGC    | Sanger sequencing |
| <i>tetM</i> -5'UTR-R                     | ACCAAAGCAACGCAGGTATC    | Sanger sequencing |
| S10-F                                    | CAGCGGATAAAATTGTGGAAA   | Sanger sequencing |
| S10-R                                    | AGCGTCAACTGTTTTTGGTG    | Sanger sequencing |
| ABC_Transporter1_<br><i>msbA</i> -F      | ATTATCGGCGCCTTAATCCT    | Sanger sequencing |
| ABC_Transporter1_<br><i>msbA</i> -R      | GGCAAAGGCATCTTTTCTCA    | Sanger sequencing |
| ABC_Transporter2_<br><i>ccmA</i> -F      | GCCGAACAAAGCATAAAAGC    | Sanger sequencing |
| ABC_Transporter2_<br><i>ccmA</i> -R      | GACTTGCCGACTGAAAAGC     | Sanger sequencing |
| Tn916-internal                           | TTGTGATTGCCTTGTGGGTA    | Long range PCR    |
| Tn916-ancestral_site <sup>a</sup>        | GCCAGCAACTGTCTCATTCA    | Long range PCR    |
| Tn916- <i>yycI</i> <sup>a</sup>          | CGGGAAGGTCAACAAGAAGA    | Long range PCR    |
| Tn916-O-antigen<br>ligase <sup>a</sup>   | TCTTTCCCCTCAACATCTGG    | Long range PCR    |
| Tn916-<br>intergenic_site_J <sup>a</sup> | ACGGTGTGGCCACTCGTAT     | Long range PCR    |

<sup>a</sup>Primer was used with the Tn916-internal primer.
